# Supplementary material for: Neonatal Cord Blood Oxylipins and Exposure to Particulate Matter in the Early-Life Environment: An ENVIRONAGE Birth Cohort Study
Source: PubMed Central journal article supplement (PMC5381981; doi:10.1289/ehp291), 2016-11-04
Supplement: EHP291.s001.acco.pdf [file EHP291.s001.acco.pdf]

**Note to readers with disabilities:** *EHP* strives to ensure that all journal content is accessible to all readers. However, some figures and Supplemental Material published in *EHP* articles may not conform to [508 standards](#) due to the complexity of the information being presented. If you need assistance accessing journal content, please contact [ehponline@niehs.nih.gov](mailto:ehponline@niehs.nih.gov). Our staff will work with you to assess and meet your accessibility needs within 3 working days.

## **Supplemental Material**

### **Neonatal Cord Blood Oxylipins and Exposure to Particulate Matter in the Early-Life Environment: An ENVIRONAGE Birth Cohort Study**

Dries S. Martens, Sandra Gouveia, Narjes Madhloum, Bram G. Janssen, Michelle Plusquin, Charlotte Vanpoucke, Wouter Lefebvre, Bertil Forsberg, Malin Nording, and Tim S. Nawrot

#### **Table of Contents**

Chemical details for UPLC-MS/MS.

Table S1. Comparison characteristics of the ENVIRONAGE data with data of the birth register of Flanders (Northern part of Belgium).

Table S2. Internal standard (IS) assignment to each native standard used for quantification.

Table S3. Calibration standard curves concentrations (pg/mL).

Table S4. Metabolite classification and description.

Table S5. Characteristics of the first derived principal component.

Table S6. Associations between oxylipin metabolites and different exposure windows of PM<sub>2.5</sub>.

Figure S1. Heat map of correlations between the different quantified oxylipins from the four main different oxylipin biosynthetic pathways

Figure S2. Schematic representation of associations between individual oxylipin metabolites and different exposure windows of PM<sub>2.5</sub>.

References

## Chemical details for UPLC-MS/MS

The following native, internal, and recovery standards were purchased from Cayman Chemicals (Ann Arbor, MI, USA): PGF<sub>2α</sub>, PGE<sub>2</sub>, TXB<sub>2</sub>, PGD<sub>2</sub>, 5(6)-EET, 8(9)-EET, 11(12)-EET, 14(15)-EET, 5,6-DHET, 8,9-DHET, 11,12-DHET, 14,15-DHET, 9(10)-EpOME, 12(13)-EpOME, 9(10)-DiHOME, 12(13)-DiHOME, 5-HETE, 8-HETE, 9-HETE, 11-HETE, 12-HETE, 15-HETE, 20-HETE, 9-HODE, 13-HODE, 15(S)-HETrE, 12-HEPE, 17-HDoHE, 5-oxo-ETE, 12-oxo-ETE, 15-oxo-ETE, 13-oxo-ODE, LTB<sub>4</sub>, Resolvin D2, Resolvin D1, 12-[[[(cyclohexylamino) carbonyl]amino]-dodecanoic acid (CUDA), 12(13)-DiHOME-d<sub>4</sub>, 9-HODE-d<sub>4</sub>, PGE<sub>2</sub>-d<sub>4</sub>, and TXB<sub>2</sub>-d<sub>4</sub>. The oxylipins 9,10,13-TriHOME and 9,12,13-TriHOME were obtained from Larodan (Sweden, Malmö). Acetonitrile and methanol were from Merck (Darmstadt, Germany). Isopropanol was purchased from VWR PROLABO (Fontenay-sous-Bois, France). Ammonium acetate was purchased from Scharlau Chemie (Barcelona, Spain). Acetic acid was purchased from Aldrich Chemical Company, Inc. (Milwaukee, WI, USA). Butylhydroxytoluene (BHT) was from Cayman Chemical (Ann Arbor, MI, USA) and ethylenediaminetetraacetic acid (EDTA) from Fluka Analytical, Sigma-Aldrich (Buchs, Switzerland). Glycerol was from Fischer Scientific (Loughborough, UK).

**Table S1. Comparison characteristics of the ENVIRONAGE data with data of the birth register of Flanders (Northern part of Belgium).** This register comprise all birth from Flanders ( $n=648\ 711$ ) from 1999-2009 (Cox et al. 2013). Values presented as percentage or as median (10-90<sup>th</sup> centile)

| <b>Characteristic</b>      | <b>ENVIRONAGE<br/>(<math>n=197</math>)</b> | <b>Flanders<br/>(<math>n=606\ 877</math>)</b> |
|----------------------------|--------------------------------------------|-----------------------------------------------|
| <b>Maternal age, years</b> | 29 (23-35)                                 | 29.5 (23.5-35.8)                              |
| <b>Education</b>           |                                            |                                               |
| Low                        | 13.7%                                      | 13.1%                                         |
| Middle                     | 38.6%                                      | 40.8%                                         |
| High                       | 47.7%                                      | 46.2%                                         |
| <b>Parity</b>              |                                            |                                               |
| 1                          | 56.4%                                      | 46.9%                                         |
| 2                          | 33.5%                                      | 34.7%                                         |
| $\geq 3$                   | 10.1%                                      | 18.4%                                         |
| <b>Gender</b>              |                                            |                                               |
| Boys                       | 54.8%                                      | 51.4%                                         |
| <b>Ethnicity</b>           |                                            |                                               |
| European                   | 85.3%                                      | 87.7%                                         |
| <b>Birth weight, g</b>     | 3450 (2855-4010)                           | 3360 (2740-3965)                              |

**Table S2. Internal standard (IS) assignment to each native standard used for quantification**

| <b>Internal standard</b>         | <b>Related native standard</b>                                                                                                                                                                                      |
|----------------------------------|---------------------------------------------------------------------------------------------------------------------------------------------------------------------------------------------------------------------|
| TXB <sub>2</sub> -d <sub>4</sub> | TXB <sub>2</sub> , 9,12,13-TriHOME, 9,10,13-TriHOME                                                                                                                                                                 |
| 12(13)-DIHOME-d <sub>4</sub>     | 12(13)-DiHOME, 9(10)-DiHOME, 14,15-DHET, 11,12-DHET, 8,9-DHET, 5,6-DHET, 12(S)-HEPE, 20-HETE                                                                                                                        |
| 9(S)-HODE-d <sub>4</sub>         | 13-HODE, 9(S)-HODE, 15-HETE, 13-oxo-ODE, 11-HETE, 15-oxo-ETE, 9-oxo-ODE, 12-HETE, 8-HETE, 15(S)-HETrE, 12-oxo-ETE, 9-HETE, 5-HETE, 14(15)-EET, 11(12)-EET, 8(9)-EET, 5(6)-EET, 5-oxo-ETE, 9(10)-EpOME, 12(13)-EpOME |
| PGE <sub>2</sub> -d <sub>4</sub> | PGF <sub>2<math>\alpha</math></sub> , PGE <sub>2</sub> , PGD <sub>2</sub> , LTB <sub>4</sub>                                                                                                                        |

**Table S3. Calibration standard curves concentrations (pg/mL)**

| <b>Standards</b> | <b>Standard concentration<br/>(pg/mL)</b> |
|------------------|-------------------------------------------|
| <b>S1</b>        | 16450                                     |
| <b>S2</b>        | 8220                                      |
| <b>S3</b>        | 4110                                      |
| <b>S4</b>        | 2060                                      |
| <b>S5</b>        | 1030                                      |
| <b>S6</b>        | 514                                       |
| <b>S7</b>        | 257                                       |
| <b>S8</b>        | 129                                       |
| <b>S9</b>        | 64                                        |
| <b>S10</b>       | 37                                        |

**Table S4. Metabolite classification and description.** Classification according to biosynthetic pathway and full name description with indication of fatty acid precursor (AA=arachidonic acid, LA=linoleic acid and EPA= eicosapentaenoic acid, DGLA= dihomo- $\gamma$ -linolenic acid). Mean cord blood plasma oxylipin concentrations (in nM) and interquartile range (IQR) from 197 individuals and amount of individuals where the metabolite could not be detected. Limit of detection (LOD) provided for each metabolite in nM

| Pathway          | Metabolite                          | Full name                            | Precursor                       | mean (IQR)  | # not detected | LOD (nM)* |
|------------------|-------------------------------------|--------------------------------------|---------------------------------|-------------|----------------|-----------|
| COX              | PGD <sub>2</sub>                    | Prostaglandin D2                     | AA                              | 0.2 (0.2)   | 2              | 0.015     |
|                  | PGE <sub>2</sub>                    | Prostaglandin E2                     | AA                              | 1.2 (1.4)   |                | 0.0032    |
|                  | PGF <sub>2<math>\alpha</math></sub> | Prostaglandin F2 $\alpha$            | AA                              | 1.6 (0.9)   |                | 0.0031    |
|                  | TXB <sub>2</sub>                    | Thromboxane B2                       | AA                              | 3.2 (4.4)   | 1              | 0.0027    |
| CYP              | 5,6-DHET                            | 5,6-dihydroxy-eicosatrienoic acid    | AA                              | 0.4 (0.3)   |                | 0.0162    |
|                  | 8,9-DHET                            | 8,9-dihydroxy-eicosatrienoic acid    | AA                              | 1.7 (1.2)   |                | 0.0162    |
|                  | 11,12-DHET                          | 11,12-dihydroxy-eicosatrienoic acid  | AA                              | 1.4 (1.2)   |                | 0.0162    |
|                  | 14,15-DHET                          | 14,15-dihydroxy-eicosatrienoic acid  | AA                              | 3.1 (1.8)   |                | 0.00325   |
|                  | 5(6)-EET                            | 5(6)-epoxy-eicosatrienoic acid       | AA                              | 3.4 (4.2)   |                | 0.0811    |
|                  | 8(9)-EET                            | 8(9)-epoxy-eicosatrienoic acid       | AA                              | 0.2 (0.3)   | 2              | 0.0156    |
|                  | 11(12)-EET                          | 11(12)-epoxy-eicosatrienoic acid     | AA                              | 0.2 (0.3)   |                | 0.00312   |
|                  | 14(15)-EET                          | 14(15)-epoxy-eicosatrienoic acid     | AA                              | 0.1 (0.2)   | 12             | 0.00312   |
|                  | 9,10-DiHOME                         | 9,10-dihydroxy-octadecenoic acid     | LA                              | 0.9 (0.7)   |                | 0.00035   |
|                  | 12,13-DiHOME                        | 12,13-dihydroxy-octadecenoic acid    | LA                              | 3.7 (6.3)   |                | 0.0035    |
|                  | 9(10)-EpOME                         | 9(10)epoxy-octadecenoic acid         | LA                              | 0.6 (0.8)   |                | 0.0877    |
|                  | 12(13)-EpOME                        | 12(13)epoxy-octadecenoic acid        | LA                              | 0.8 (1.0)   |                | 0.0877    |
|                  | 20-HETE                             | 20-hydroxy-eicosatetraenoic acid     | AA                              | 0.5 (0.5)   | 6              | 0.1819    |
|                  | 5-LOX                               | 5-HETE                               | 5-hydroxy-eicosatetraenoic acid | AA          | 0.8 (0.9)      |           |
| 5-oxoETE         |                                     | 5-oxo-eicosatetraenoic acid          | AA                              | 0.1 (0.1)   | 9              | 0.0157    |
| 9(S)-HODE        |                                     | 9-hydroxy-octadecadienoic acid       | LA                              | 2.3 (2.3)   |                | 0.00037   |
| LTB <sub>4</sub> |                                     | Leukotriene B4                       | AA                              | 0.04 (0.04) | 141            | 0.016     |
| 9,10,13-TriHOME  |                                     | 9,10,13-trihydroxy-octadecenoic acid | LA                              | 2.9 (4.2)   |                | 0.003     |
| 9,12,13-TriHOME  |                                     | 9,12,13-trihydroxy-octadecenoic acid | LA                              | 2.0 (2.7)   |                | 0.00015   |
| 12/15-LOX        | 8-HETE                              | 8-hydroxy-eicosatetraenoic acid      | AA                              | 0.4 (0.4)   |                | 0.0312    |
|                  | 9-HETE                              | 9-hydroxy-eicosatetraenoic acid      | AA                              | 0.3 (0.4)   | 46             | 0.0156    |
|                  | 11-HETE                             | 11-hydroxy-eicosatetraenoic acid     | AA                              | 0.4 (0.4)   |                | 0.00171   |
|                  | 12-HETE                             | 12-hydroxy-eicosatetraenoic acid     | AA                              | 3.5 (6.0)   |                | 0.0156    |
|                  | 12(S)-HEPE                          | 12-hydroxy-eicosapentaenoic acid     | EPA                             | 0.2 (0.3)   | 4              | 0.0035    |
|                  | 12-oxoETE                           | 12-oxo-eicosatetraenoic acid         | AA                              | 0.5 (0.6)   | 87             | 0.00312   |
|                  | 15-HETE                             | 15-hydroxy-eicosatetraenoic acid     | AA                              | 0.5 (0.4)   |                | 0.0034    |
|                  | 15(S)-HETrE                         | 15-hydroxy-eicosatrienoic acid       | DGLA                            | 0.3 (0.3)   | 1              | 0.0016    |
|                  | 15-oxoETE                           | 15-oxo-eicosatetraenoic acid         | AA                              | 0.07 (0.07) | 2              | 0.0157    |
|                  | 13-HODE                             | 13-hydroxy-octadecadienoic acid      | LA                              | 3.7 (3.1)   |                | 0.0185    |
| 13-oxoODE        | 13-oxo-octadecadienoic acid         | LA                                   | 0.3 (0.3)                       | 7           | 0.1692         |           |

Classification based on Zivkovic *et al.* (Zivkovic et al. 2012).

\* LOD based on Gouveia-Figueira *et al.* (Gouveia-Figueira et al. 2015)

**Table S5. Characteristics of the first derived principal component.** Classification of principal components for each pathway with indications of individual metabolite loadings

| <b>Pathway PC</b> | <b>Eigenvalues</b> | <b>Variance explained</b> | <b>Metabolite</b> | <b>Loadings</b> |
|-------------------|--------------------|---------------------------|-------------------|-----------------|
| PC: COX           | 1.94               | 48%                       | PGD <sub>2</sub>  | 0.76            |
|                   |                    |                           | PGE <sub>2</sub>  | 0.82            |
|                   |                    |                           | PGF <sub>2α</sub> | 0.36            |
|                   |                    |                           | TXB <sub>2</sub>  | 0.74            |
| PC: CYP           | 5.42               | 42%                       | 5,6-DHET          | 0.71            |
|                   |                    |                           | 8,9-DHET          | 0.83            |
|                   |                    |                           | 11,12-DHET        | 0.87            |
|                   |                    |                           | 14,15-DHET        | 0.81            |
|                   |                    |                           | 5(6)-EET          | 0.54            |
|                   |                    |                           | 8(9)-EET          | 0.56            |
|                   |                    |                           | 11(12)-EET        | 0.29            |
|                   |                    |                           | 14(15)-EET        | 0.39            |
|                   |                    |                           | 9,10-DiHOME       | 0.80            |
|                   |                    |                           | 12,13-DiHOME      | 0.69            |
|                   |                    |                           | 9(10)-EpOME       | 0.62            |
|                   |                    |                           | 12(13)-EpOME      | 0.18            |
|                   |                    |                           | 20-HETE           | 0.66            |
| PC: 5-LOX         | 2.57               | 43%                       | 5-HETE            | 0.62            |
|                   |                    |                           | 5-oxoETE          | 0.61            |
|                   |                    |                           | 9(S)-HODE         | 0.76            |
|                   |                    |                           | LTB <sub>4</sub>  | 0.05            |
|                   |                    |                           | 9,10,13-TriHOME   | 0.76            |
|                   |                    |                           | 9,12,13-TriHOME   | 0.81            |
| PC: 12/15-LOX     | 6.03               | 55%                       | 8-HETE            | 0.83            |
|                   |                    |                           | 9-HETE            | 0.31            |
|                   |                    |                           | 11-HETE           | 0.93            |
|                   |                    |                           | 12-HETE           | 0.83            |
|                   |                    |                           | 12(S)-HEPE        | 0.63            |
|                   |                    |                           | 12-oxoETE         | 0.55            |
|                   |                    |                           | 15-HETE           | 0.90            |
|                   |                    |                           | 15(S)-HETrE       | 0.88            |
|                   |                    |                           | 15-oxoETE         | 0.64            |
|                   |                    |                           | 13-HODE           | 0.81            |
|                   |                    |                           | 13-oxoODE         | 0.59            |

**Table S6. Associations of oxylipin metabolites and different exposure windows of PM<sub>2.5</sub>.** Beta-coefficients presented for each 5 µg/m<sup>3</sup> increase of PM<sub>2.5</sub>

|                   | Trimester 1         |         | Trimester 2         |         | Trimester 3         |         | Entire Pregnancy    |         |
|-------------------|---------------------|---------|---------------------|---------|---------------------|---------|---------------------|---------|
|                   | β (95% CI)          | p-Value | β (95% CI)          | p-Value | β (95% CI)          | p-Value | β (95% CI)          | p-Value |
| <b>COX</b>        |                     |         |                     |         |                     |         |                     |         |
| PGD <sub>2</sub>  | -0.04 (-0.12, 0.04) | 0.29    | 0.04 (-0.02, 0.09)  | 0.23    | -0.02 (-0.10, 0.06) | 0.55    | 0.02 (-0.10, 0.14)  | 0.75    |
| PGE <sub>2</sub>  | -0.03 (-0.1, 0.03)  | 0.32    | -0.02 (-0.07, 0.03) | 0.42    | -0.05 (-0.12, 0.02) | 0.17    | -0.08 (-0.18, 0.03) | 0.15    |
| PGF <sub>2α</sub> | -0.01 (-0.05, 0.02) | 0.48    | -0.02 (-0.04, 0.01) | 0.22    | -0.02 (-0.05, 0.02) | 0.40    | -0.05 (-0.1, 0.01)  | 0.09    |
| TXB <sub>2</sub>  | -0.07 (-0.18, 0.04) | 0.23    | 0.04 (-0.04, 0.12)  | 0.35    | -0.08 (-0.20, 0.03) | 0.17    | -0.01 (-0.19, 0.17) | 0.92    |
| <b>CYP</b>        |                     |         |                     |         |                     |         |                     |         |
| 5,6-DHET          | -0.04 (-0.09, 0.01) | 0.15    | 0.04 (0.00, 0.08)   | 0.08    | -0.03 (-0.09, 0.03) | 0.28    | 0.02 (-0.07, 0.11)  | 0.69    |
| 8,9-DHET          | 0.00 (-0.03, 0.04)  | 0.88    | 0.02 (-0.01, 0.05)  | 0.14    | 0.01 (-0.03, 0.05)  | 0.57    | 0.04 (-0.01, 0.10)  | 0.13    |
| 11,12-DHET        | -0.01 (-0.05, 0.03) | 0.65    | 0.03 (0.00, 0.07)   | 0.04    | 0.01 (-0.04, 0.05)  | 0.77    | 0.06 (-0.01, 0.13)  | 0.11    |
| 14,15-DHET        | 0.00 (-0.03, 0.03)  | 0.94    | 0.02 (-0.01, 0.04)  | 0.22    | 0.01 (-0.02, 0.04)  | 0.59    | 0.03 (-0.02, 0.08)  | 0.23    |
| 5(6)-EET          | -0.03 (-0.11, 0.04) | 0.38    | 0.04 (-0.01, 0.10)  | 0.13    | -0.05 (-0.13, 0.03) | 0.22    | 0.04 (-0.08, 0.16)  | 0.56    |
| 8(9)-EET          | -0.02 (-0.11, 0.07) | 0.74    | 0.02 (-0.05, 0.08)  | 0.60    | -0.04 (-0.13, 0.06) | 0.45    | 0.00 (-0.14, 0.14)  | 0.99    |
| 11(12)-EET        | -0.05 (-0.12, 0.02) | 0.14    | 0.03 (-0.02, 0.08)  | 0.25    | -0.03 (-0.10, 0.05) | 0.44    | 0.00 (-0.11, 0.11)  | 0.99    |
| 14(15)-EET        | -0.04 (-0.18, 0.09) | 0.53    | 0.02 (-0.08, 0.13)  | 0.63    | -0.08 (-0.22, 0.06) | 0.25    | -0.03 (-0.25, 0.18) | 0.78    |
| 9,10-DiHOME       | -0.02 (-0.07, 0.03) | 0.53    | 0.03 (-0.01, 0.06)  | 0.18    | -0.01 (-0.07, 0.04) | 0.65    | 0.03 (-0.05, 0.11)  | 0.43    |
| 12,13-DiHOME      | -0.01 (-0.07, 0.04) | 0.61    | 0.02 (-0.02, 0.06)  | 0.39    | 0.00 (-0.06, 0.06)  | 0.98    | 0.03 (-0.06, 0.12)  | 0.53    |
| 9(10)-EpOME       | 0.00 (-0.07, 0.07)  | 0.98    | 0.04 (-0.02, 0.09)  | 0.20    | -0.03 (-0.10, 0.05) | 0.49    | 0.05 (-0.06, 0.17)  | 0.37    |
| 12(13)-EpOME      | -0.01 (-0.09, 0.06) | 0.75    | 0.02 (-0.04, 0.08)  | 0.54    | -0.02 (-0.11, 0.06) | 0.55    | 0.01 (-0.11, 0.13)  | 0.89    |
| 20-HETE           | -0.05 (-0.11, 0.01) | 0.08    | 0.07 (0.02, 0.11)   | 0.004   | -0.03 (-0.10, 0.03) | 0.27    | 0.06 (-0.04, 0.16)  | 0.22    |
| <b>5-LOX</b>      |                     |         |                     |         |                     |         |                     |         |
| 5-HETE            | 0.00 (-0.06, 0.06)  | 0.99    | 0.05 (0.01, 0.09)   | 0.03    | 0.01 (-0.05, 0.07)  | 0.79    | 0.09 (0.00, 0.18)   | 0.05    |
| 5-oxoETE          | 0.06 (-0.04, 0.16)  | 0.22    | 0.08 (0.01, 0.15)   | 0.03    | 0.06 (-0.04, 0.16)  | 0.24    | 0.22 (0.07, 0.38)   | 0.006   |
| 9(S)-HODE         | -0.01 (-0.07, 0.04) | 0.64    | 0.05 (0.00, 0.10)   | 0.06    | -0.02 (-0.08, 0.04) | 0.51    | 0.07 (-0.04, 0.18)  | 0.20    |
| LTB <sub>4</sub>  | 0.04 (-0.03, 0.11)  | 0.30    | -0.01 (-0.06, 0.05) | 0.77    | 0.00 (-0.08, 0.07)  | 0.97    | 0.01 (-0.10, 0.13)  | 0.82    |
| 9,10,13-TriHOME   | 0.01 (-0.06, 0.08)  | 0.75    | 0.04 (-0.01, 0.08)  | 0.16    | 0.05 (-0.02, 0.12)  | 0.17    | 0.10 (-0.01, 0.20)  | 0.08    |
| 9,12,13-TriHOME   | 0.01 (-0.05, 0.07)  | 0.79    | 0.04 (-0.01, 0.09)  | 0.10    | 0.04 (-0.03, 0.10)  | 0.23    | 0.10 (0.00, 0.20)   | 0.05    |
| <b>12/15-LOX</b>  |                     |         |                     |         |                     |         |                     |         |
| 8-HETE            | -0.02 (-0.09, 0.05) | 0.63    | 0.06 (0.01, 0.11)   | 0.02    | -0.03 (-0.1, 0.04)  | 0.39    | 0.09 (-0.02, 0.2)   | 0.12    |
| 9-HETE            | 0.04 (-0.10, 0.18)  | 0.58    | 0.06 (-0.04, 0.17)  | 0.22    | -0.06 (-0.21, 0.08) | 0.38    | 0.11 (-0.12, 0.33)  | 0.35    |
| 11-HETE           | -0.02 (-0.08, 0.05) | 0.58    | 0.06 (0.01, 0.10)   | 0.02    | -0.01 (-0.08, 0.05) | 0.66    | 0.08 (-0.02, 0.19)  | 0.10    |
| 12-HETE           | -0.07 (-0.19, 0.05) | 0.23    | 0.11 (0.02, 0.20)   | 0.02    | -0.07 (-0.19, 0.06) | 0.28    | 0.12 (-0.07, 0.32)  | 0.20    |
| 12(S)-HEPE        | -0.06 (-0.18, 0.05) | 0.28    | 0.11 (0.02, 0.19)   | 0.02    | -0.08 (-0.21, 0.04) | 0.17    | 0.12 (-0.07, 0.30)  | 0.22    |
| 12-oxoETE         | -0.04 (-0.25, 0.18) | 0.73    | 0.18 (0.01, 0.34)   | 0.03    | -0.04 (-0.26, 0.19) | 0.76    | 0.28 (-0.06, 0.63)  | 0.11    |
| 15-HETE           | -0.01 (-0.07, 0.06) | 0.83    | 0.07 (0.02, 0.11)   | 0.006   | -0.02 (-0.09, 0.04) | 0.51    | 0.10 (0.00, 0.20)   | 0.04    |
| 15(S)-HETrE       | -0.02 (-0.10, 0.06) | 0.64    | 0.06 (0.00, 0.12)   | 0.04    | -0.02 (-0.10, 0.07) | 0.72    | 0.09 (-0.03, 0.22)  | 0.15    |
| 15-oxoETE         | -0.02 (-0.10, 0.06) | 0.59    | 0.04 (-0.02, 0.10)  | 0.16    | -0.01 (-0.09, 0.07) | 0.80    | 0.06 (-0.07, 0.19)  | 0.36    |
| 13-HODE           | -0.02 (-0.09, 0.04) | 0.48    | 0.05 (0.00, 0.09)   | 0.05    | -0.03 (-0.09, 0.04) | 0.44    | 0.06 (-0.04, 0.16)  | 0.26    |
| 13-oxoODE         | 0.01 (-0.07, 0.09)  | 0.79    | 0.03 (-0.03, 0.09)  | 0.27    | -0.03 (-0.11, 0.06) | 0.53    | 0.06 (-0.07, 0.18)  | 0.38    |



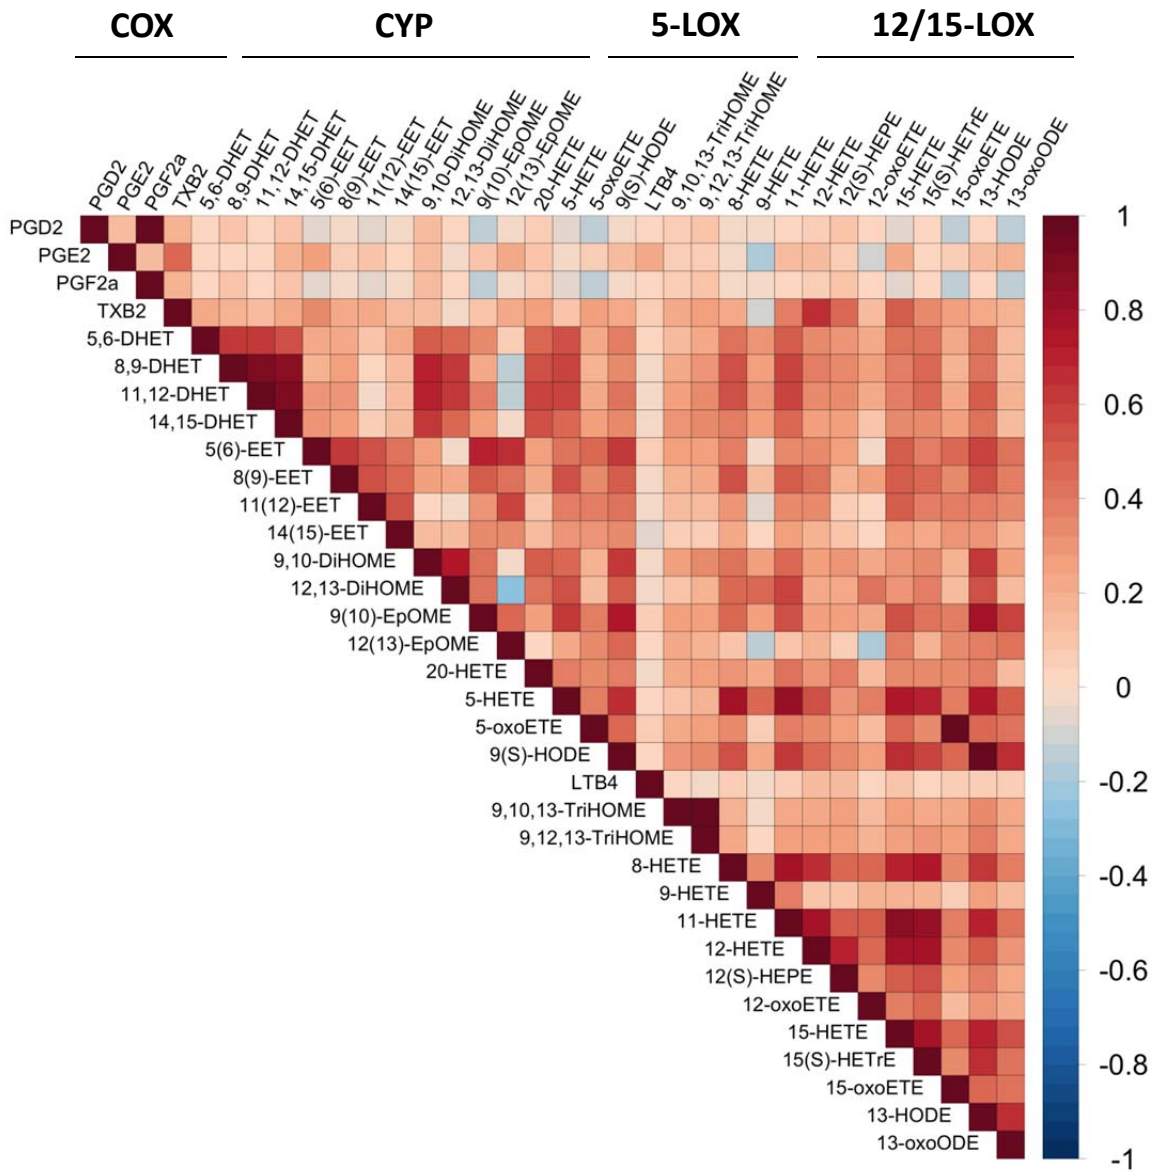

**Figure S1.** Heat map of correlations between the different quantified oxylipins from the four main different oxylipin biosynthetic pathways. Each colored square represents the Pearson correlation coefficient between different metabolites.

|                 |                   | <b>PM<sub>2.5</sub> Exposure window</b> |        |        |                  |
|-----------------|-------------------|-----------------------------------------|--------|--------|------------------|
|                 |                   | Trim 1                                  | Trim 2 | Trim 3 | Entire Pregnancy |
| <b>COX</b>      |                   |                                         |        |        |                  |
|                 | PGD <sub>2</sub>  |                                         |        |        |                  |
|                 | PGE <sub>2</sub>  |                                         |        |        |                  |
|                 | PGF <sub>2α</sub> |                                         |        |        | -                |
|                 | TXB <sub>2</sub>  |                                         |        |        |                  |
| <b>CYP</b>      |                   |                                         | +      |        |                  |
|                 | 5,6-DHET          |                                         | +      |        |                  |
|                 | 8,9-DHET          |                                         |        |        |                  |
|                 | 11,12-DHET        |                                         | +      |        |                  |
|                 | 14,15-DHET        |                                         |        |        |                  |
|                 | 5(6)-EET          |                                         |        |        |                  |
|                 | 8(9)-EET          |                                         |        |        |                  |
|                 | 11(12)-EET        |                                         |        |        |                  |
|                 | 14(15)-EET        |                                         |        |        |                  |
|                 | 9,10-DiHOME       |                                         |        |        |                  |
|                 | 12,13-DiHOME      |                                         |        |        |                  |
|                 | 9(10)-EpOME       |                                         |        |        |                  |
|                 | 12(13)-EpOME      |                                         |        |        |                  |
|                 | 20-HETE           | -                                       | +      |        |                  |
| <b>5-LOX</b>    |                   |                                         | +      |        | +                |
|                 | 5-HETE            |                                         | +      |        | +                |
|                 | 5-oxoETE          |                                         | +      |        | +                |
|                 | 9(S)-HODE         |                                         | +      |        |                  |
|                 | LTB <sub>4</sub>  |                                         |        |        |                  |
|                 | 9,10,13-TriHOME   |                                         |        |        | +                |
|                 | 9,12,13-TriHOME   |                                         | +      |        | +                |
| <b>12/15LOX</b> |                   |                                         | +      |        | +                |
|                 | 8-HETE            |                                         | +      |        |                  |
|                 | 9-HETE            |                                         |        |        |                  |
|                 | 11-HETE           |                                         | +      |        | +                |
|                 | 12-HETE           |                                         | +      |        |                  |
|                 | 12(S)-HEPE        |                                         | +      |        |                  |
|                 | 12-oxoETE         |                                         | +      |        |                  |
|                 | 15-HETE           |                                         | +      |        | +                |
|                 | 15(S)-HETrE       |                                         | +      |        |                  |
|                 | 15-oxoETE         |                                         |        |        |                  |
|                 | 13-HODE           |                                         | +      |        |                  |
|                 | 13-oxoODE         |                                         |        |        |                  |

**Figure S2. Schematic representation of association between individual oxylipin metabolites and different exposure windows of PM<sub>2.5</sub>.** Positive and negative associations are indicated by + and – signs respectively. Plain grey indicates  $p < 0.05$  and grey striped indicates  $0.05 < p < 0.1$

## References

Cox B, Martens E, Nemery B, Vangronsveld J, Nawrot TS. 2013. Impact of a stepwise introduction of smoke-free legislation on the rate of preterm births: Analysis of routinely collected birth data. *BMJ* 346:f441.

Gouveia-Figueira S, Nording ML, Gaida JE, Forsgren S, Alfredson H, Fowler CJ. 2015. Serum levels of oxylipins in achilles tendinopathy: An exploratory study. *PLoS One* 10:e0123114.

Zivkovic AM, Yang J, Georgi K, Hegedus C, Nording ML, O'Sullivan A, et al. 2012. Serum oxylipin profiles in iga nephropathy patients reflect kidney functional alterations. *Metabolomics* 8:1102-1113.
